# Supplementary material for: Amplifying TLR-MyD88 Signals within Tumor-Specific T Cells Enhances Antitumor Activity to Suboptimal Levels of Weakly Immunogenic Tumor Antigens
Source: Oxford University Press journal article supplement (doi:10.1158/0008-5472.can-10-0247), 2010-08-31
Supplement: 00085472can100247-sup-can_10-0247_geng.pdf [file 00085472can100247-sup-can_10-0247_geng.pdf]

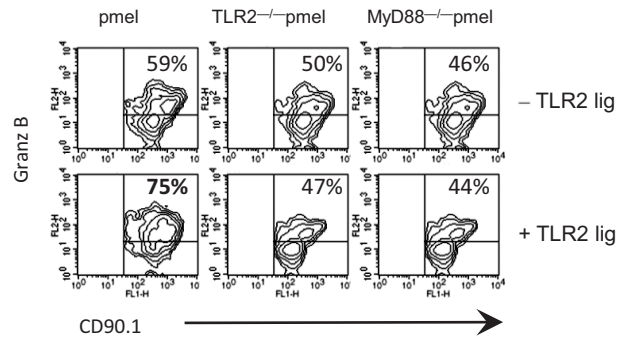

**Supplemental 1. Activating TLR2-MyD88 signals in tumor-reactive CD8 T-cells augments granzyme B production.** Purified pmel, TLR2<sup>-/-</sup>pmel and MyD88<sup>-/-</sup>pmel CD8 T-cells were activated with MyD88<sup>-/-</sup>splenocytes pulsed with mgp100 peptide with or without TLR2 agonist. Four days later the intracellular level of granzyme B were determined by flow cytometry. Shown on the upper right-hand of each plot are the percent of cytokine-positive cells. All data are representative of three or more independent experiments each yielding identical results.

*Geng et al*

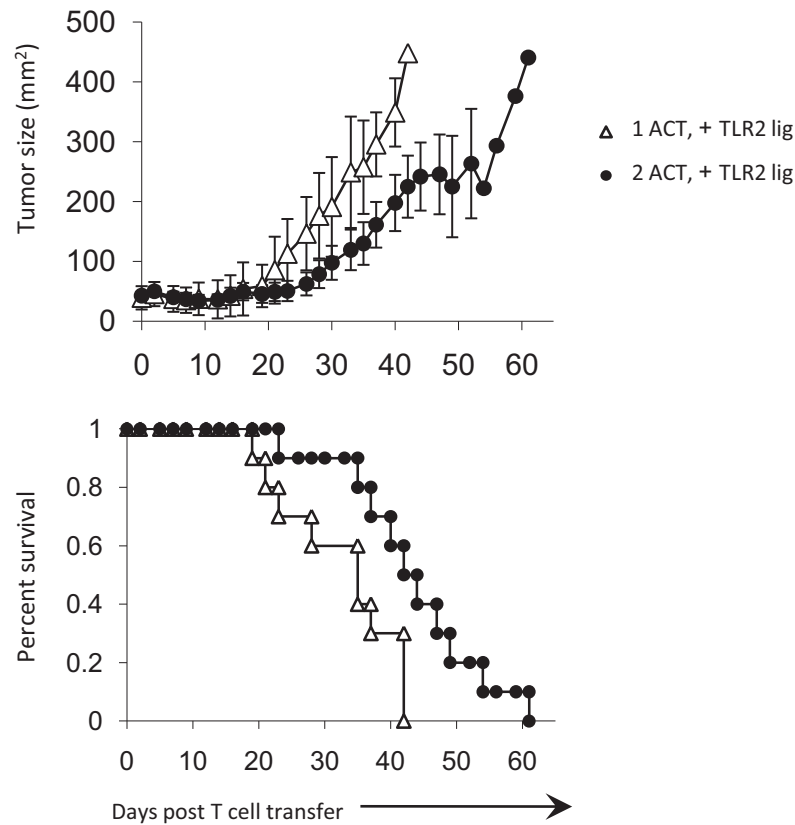

**Supplemental-2. Antitumor effects of a second round of ACT.** Wild type BL6 were injected (s.c.) with B16 melanoma cells and sublethally irradiated (400 cGy) when tumors reached a size of approximately of 50 mm<sup>2</sup>. Mice were injected (i.v.;  $1 \times 10^6$ ) with previously-activated pmel T cells one day after irradiation or were injected twice, one and fifteen days after irradiation. All mice were injected i.p. with mgp100<sub>25-33</sub> antigen and anti-CD40 antibody and weekly peritumoral s.c. injections of TLR2 ligand or control saline. Tumor sizes were calculated by measuring perpendicular by longitudinal diameter. Data are compiled from two independent experiments (n=5 experiment), each yielding identical trends; \* $P < 0.01$ .

*Geng et al*

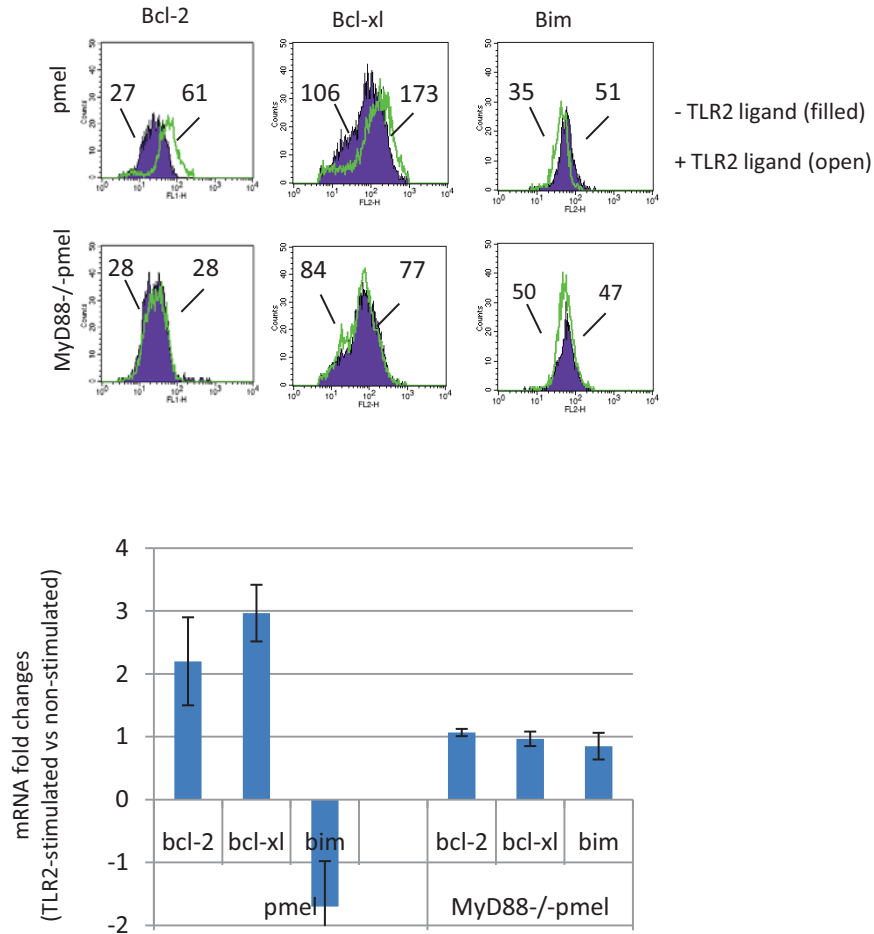

**Supplemental 3. Activating TLR2-MyD88 signals in tumor-reactive CD8 T-cells alters apoptosis-related protein and transcript expression levels.** Purified pmel and MyD88<sup>-/-</sup>pmel CD8 T-cells were activated with MyD88<sup>-/-</sup>splenocytes pulsed with mgp100 peptide with or without TLR2 agonist. Four days later the intracellular level of bcl-2, bcl-xl and bim were determined by flow cytometry or by real time PCR. (A) Histogram of intracellular levels of apoptosis-related proteins with (filled) or without TLR2 ligand (open). Mean fluorescence intensities are provided in each histogram. (B) Fold changes in mRNA transcript levels of TLR2-stimulated versus non-TLR stimulated T cells. All data are representative of three independent experiments each yielding identical trends.
